# Supplementary material for: Sequential Shortest Path Interdiction with Incomplete Information and Limited Feedback
Source: Atypon-hosted journal article supplement (doi:10.1287/deca.2021.0426), 2021-08-19
Supplement: deca.2021.0426.sm1.pdf [file deca.2021.0426.sm1.pdf]

## Online Supplement

### Appendix B: Decision-making process for network $G_2$ in Figure 3

- **Step 0:**  $I^{0,\lambda} = \emptyset$ ,  $z^0 = 2$ ;
- **Step 1:**  $I^{1,\lambda} = \{(1,3), (1,4)\}$ , and the interdicator would expect the evader to traverse path 1 – 2 – 5.

This implies that  $z_R^{1,*} = 7$  and that the evader would go through path 1 – 2 – 5, implying that  $z^{1,\lambda} = 2$ .

- **Step 2:**  $I^{2,\lambda} = \{(1,3), (4,5)\}$ ,  $z_R^{2,*} = 7$ ,  $z^{2,\lambda} = 2$ ;
- **Step 3:**  $I^{3,\lambda} = \{(1,4), (3,5)\}$ ,  $z_R^{3,*} = 7$ ,  $z^{3,\lambda} = 2$ ;
- **Step 4:**  $I^{4,\lambda} = \{(3,5), (4,5)\}$ ,  $z_R^{4,*} = 7$ ,  $z^{4,\lambda} = 2$ ;
- **Step 5:**  $I^{5,\lambda} = \{(1,2), (1,4)\}$ ,  $z_R^{5,*} = 6$ ,  $z^{5,\lambda} = 3$ ;
- **Step 6:**  $I^{6,\lambda} = \{(1,2), (4,5)\}$ ,  $z_R^{6,*} = 6$ ,  $z^{6,\lambda} = 3$ ;
- **Step 7:**  $I^{7,\lambda} = \{(1,4), (2,5)\}$ ,  $z_R^{7,*} = 6$ ,  $z^{7,\lambda} = 3$ ;
- **Step 8:**  $I^{8,\lambda} = \{(2,5), (4,5)\}$ ,  $z_R^{8,*} = 6$ ,  $z^{8,\lambda} = 3$ ;
- **Step 9:**  $I^{9,\lambda} = \{(1,4), (4,5)\}$ ,  $z_R^{9,*} = 6$ ,  $z^{9,\lambda} = 2$ ;
- **Step 10:**  $I^{10,\lambda} = \{(1,2), (1,3)\}$ ,  $z_R^{10,*} = 5$ ,  $z^{10,\lambda} = 4$ ;
- **Step 11:**  $I^{11,\lambda} = \{(1,2), (3,5)\}$ ,  $z_R^{11,*} = 5$ ,  $z^{11,\lambda} = 4$ ;
- **Step 12:**  $I^{12,\lambda} = \{(1,3), (2,5)\}$ ,  $z_R^{12,*} = 5$ ,  $z^{12,\lambda} = 4$ ;
- **Step 13:**  $I^{13,\lambda} = \{(2,5), (3,5)\}$ ,  $z_R^{13,*} = 5$ ,  $z^{13,\lambda} = 4$ ;
- **Step 14:**  $I^{14,\lambda} = \{(1,2), (2,5)\}$ ,  $z_R^{14,*} = 5$ ,  $z^{14,\lambda} = 3$ ;
- **Step 15:**  $I^{15,\lambda} = \{(1,3), (3,5)\}$ ,  $z_R^{15,*} = 5$ ,  $z^{15,\lambda} = 2$ ;
- **Step 16:**  $I^{16,\lambda} = \{(1,2), (2,3)\}$ ,  $z_R^{16,*} = 4$ ,  $z^{16,\lambda} = 4$ .

We can see that after 16 steps, the interdicator finally identifies an optimal solution for the full information problem.

## Appendix C: Supplementary Computational Results for Uniform Random Graphs

### C.1. Policy Performance: Sensitivity with Respect to $p_r$ and $p_v$

In Section 7.4, we test the performance of the approximate GRN policies on uniform random graphs with right-skewed costs. For left-skewed and symmetric cost structures, we use the same graph size as in Section 7.4, i.e.  $n = 50$  and probability of having an arc between any two nodes is 0.5. We set  $T = 50$ .

The results for symmetric and left-skewed costs are shown in Figure 7 and 8, respectively. We observe that for both response-imperfect and value-imperfect feedback, GRN policies obtain optimal solutions in less time steps as  $p_r$  or  $p_v$  increases. Moreover, under value-imperfect feedback, the policies converge faster than under response-imperfect feedback.

**Figure 7** Average time-stability for policies in  $\underline{\Delta}$  for different types of feedback as  $p_r$  and  $p_v$  increase for  $k = 6$  and the symmetric costs ( $T = 50$ , uniform random graphs, greedy evader).

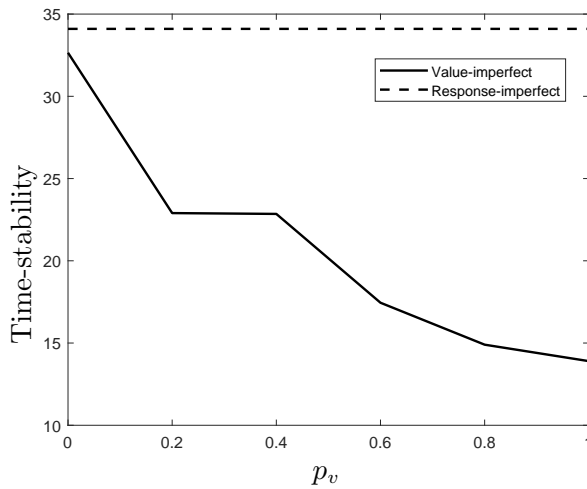

$p_r = 0.5$ ,  $p_v$  vs. time-stability, symmetric

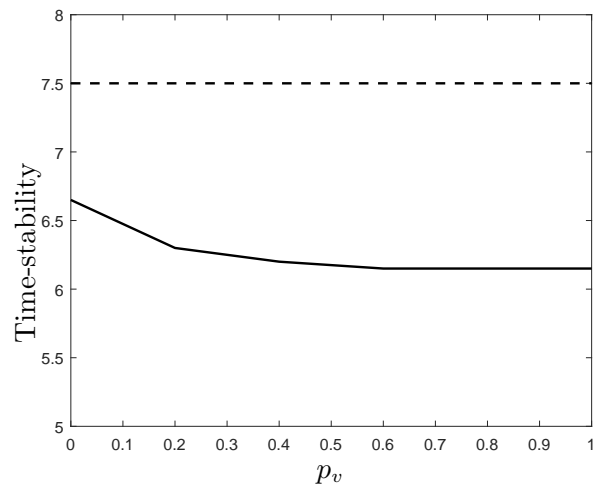

$p_r = 1.0$ ,  $p_v$  vs. time-stability, symmetric

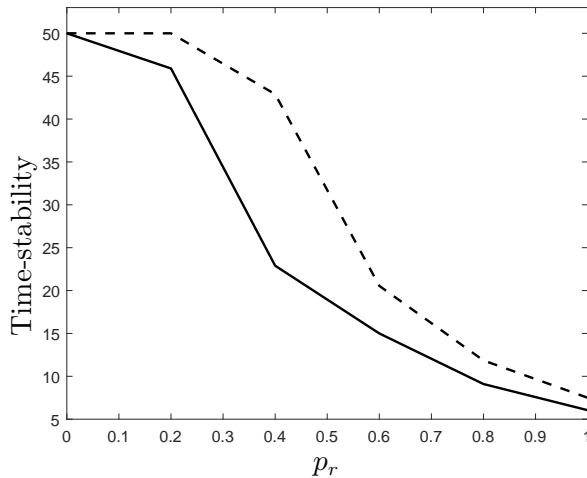

$p_v = 0.5$ ,  $p_r$  vs. time-stability, symmetric

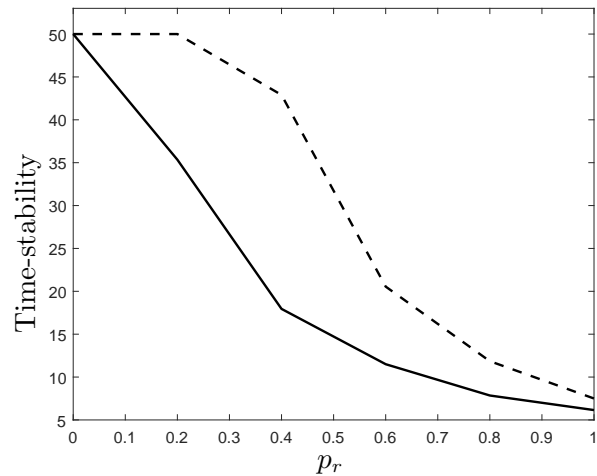

$p_v = 1.0$ ,  $p_r$  vs. time-stability, symmetric

**Figure 8** Average time-stability for policies in  $\underline{\Delta}$  for different types of feedback as  $p_r$  and  $p_v$  increase for  $k = 6$  and the left-skewed costs ( $T = 50$ , uniform random graphs, greedy evader).

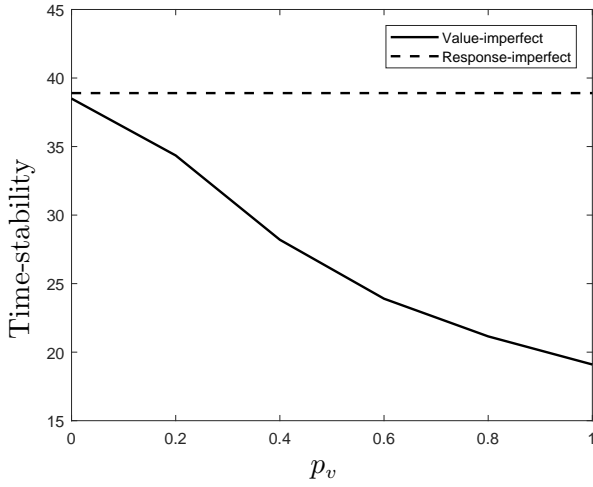

$p_r = 0.5$ ,  $p_v$  vs. time-stability, left-skewed

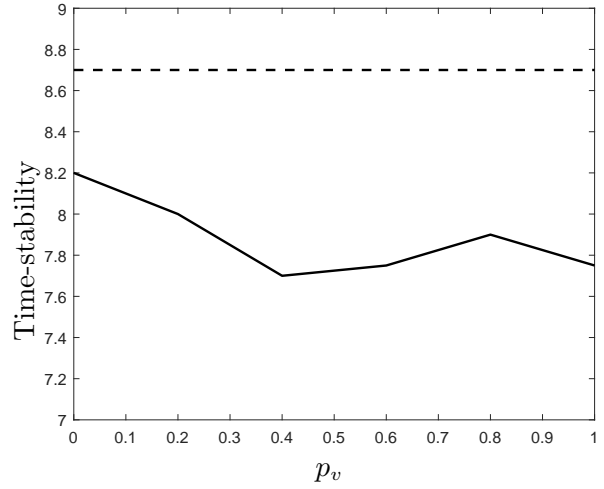

$p_r = 1.0$ ,  $p_v$  vs. time-stability, left-skewed

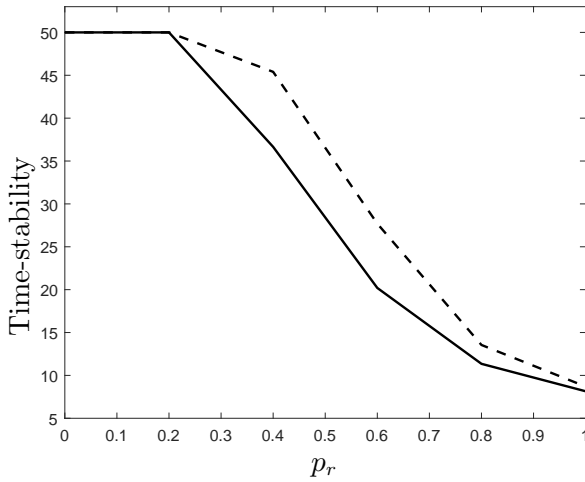

$p_v = 0.5$ ,  $p_r$  vs. time-stability, left-skewed

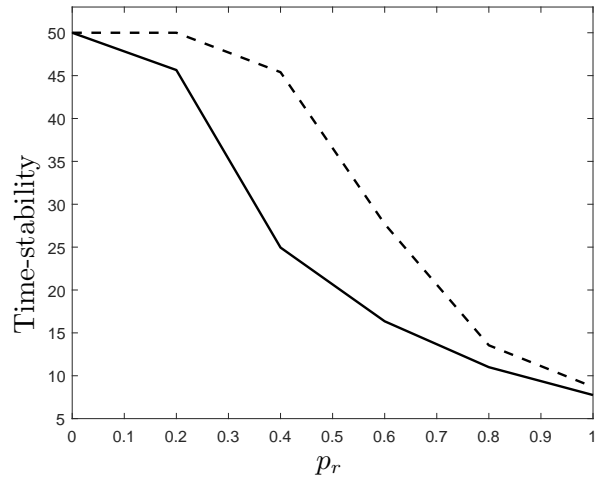

$p_v = 1.0$ ,  $p_r$  vs. time-stability, left-skewed

### C.2. Performance under a General Evader

In Section 7.6, we test policy performance when we relax the assumption on the greedy nature of the evader and consider the setting introduced in Section 6, where the evader’s response is constrained to a  $1 - n$  (not necessarily shortest) path on the interdicted graph. Policy performance under Random-0.9 and Random-0.5 is depicted in Tables 6 and 7, respectively. The definitions of Random-0.9 and Random-0.5 evader can be found in Section 7.6. Observe that with *less randomness*, for example under Random-0.9 evader, there are more cases where the approximate GRN policies outperform the mean-bound policies.

**Table 6** Average time-stability and MAD (in parenthesis) for  $\lambda_v^G \in \underline{\Lambda}_v^G$  and  $\pi_M^G \in \Pi_M^G$  policies (with value-imperfect feedback) when evader type is Random-0.9 on uniform random graphs with  $k = 6$  and  $T = 100$ . Note that a Random-0.9 evader chooses the shortest path with probability 0.9 and the second shortest path with probability 0.1.

| $n$ |                                   | Right-skewed  |                         | Symmetric     |                         | Left-skewed   |                         | Random        |                         |
|-----|-----------------------------------|---------------|-------------------------|---------------|-------------------------|---------------|-------------------------|---------------|-------------------------|
|     |                                   | $\lambda_v^G$ | $\pi_M^G(+\mathcal{V})$ | $\lambda_v^G$ | $\pi_M^G(+\mathcal{V})$ | $\lambda_v^G$ | $\pi_M^G(+\mathcal{V})$ | $\lambda_v^G$ | $\pi_M^G(+\mathcal{V})$ |
| 15  | Time-stability ( $\tilde{\tau}$ ) | <b>20.2</b>   | 70.9                    | <b>13.7</b>   | 23.5                    | 20.0          | <b>19.0</b>             | <b>20.6</b>   | 59.7                    |
|     | MAD                               | 23.9          | 35.0                    | 5.5           | 31.7                    | 6.9           | 8.0                     | 5.2           | 41.6                    |
|     | Total regret ( $\tilde{R}^T$ )    | 580.8         | 806.8                   | 106.6         | 62.5                    | 166.5         | 140.3                   | 221.0         | 310.6                   |
|     | MAD                               | 895.8         | 850.1                   | 35.1          | 29.2                    | 47.3          | 45.7                    | 61.5          | 154.7                   |
| 20  | Time-stability ( $\tilde{\tau}$ ) | <b>32.9</b>   | 71.3                    | <b>19.8</b>   | 21.6                    | <b>18.9</b>   | 24.4                    | <b>19.5</b>   | 34.7                    |
|     | MAD                               | 40.1          | 35.2                    | 7.7           | 28.7                    | 7.1           | 8.0                     | 6.5           | 30.5                    |
|     | Total regret ( $\tilde{R}^T$ )    | 1065.5        | 1189.9                  | 132.4         | 54.8                    | 118.8         | 130.5                   | 164.8         | 181.1                   |
|     | MAD                               | 1438.0        | 1334.1                  | 50.5          | 36.6                    | 39.0          | 43.4                    | 67.6          | 117.1                   |
| 25  | Time-stability ( $\tilde{\tau}$ ) | <b>15.3</b>   | 70.6                    | 15.2          | <b>12.9</b>             | 25.3          | <b>22.3</b>             | <b>21.8</b>   | 60.8                    |
|     | MAD                               | 17.0          | 34.8                    | 4.9           | 16.4                    | 7.1           | 7.7                     | 4.4           | 38.8                    |
|     | Total regret ( $\tilde{R}^T$ )    | 315.4         | 549.0                   | 96.3          | 42.0                    | 149.3         | 115.2                   | 168.7         | 314.5                   |
|     | MAD                               | 491.4         | 529.7                   | 28.4          | 26.1                    | 39.0          | 35.9                    | 53.9          | 210.8                   |
| 30  | Time-stability ( $\tilde{\tau}$ ) | <b>34.8</b>   | 77.0                    | <b>19.8</b>   | 35.9                    | <b>24.9</b>   | 28.0                    | <b>20.3</b>   | 38.8                    |
|     | MAD                               | 39.2          | 30.4                    | 9.7           | 41.3                    | 5.8           | 12.4                    | 4.4           | 25.7                    |
|     | Total regret ( $\tilde{R}^T$ )    | 965.0         | 1091.0                  | 122.3         | 253.4                   | 118.9         | 118.6                   | 144.8         | 178.2                   |
|     | MAD                               | 1290.7        | 1190.3                  | 68.3          | 332.5                   | 36.7          | 49.0                    | 39.1          | 76.4                    |
| 35  | Time-stability ( $\tilde{\tau}$ ) | <b>24.6</b>   | 78.2                    | <b>13.9</b>   | 21.2                    | <b>20.1</b>   | 28.0                    | <b>28.7</b>   | 57.4                    |
|     | MAD                               | 30.2          | 30.8                    | 5.8           | 29.1                    | 5.4           | 7.7                     | 10.5          | 37.3                    |
|     | Total regret ( $\tilde{R}^T$ )    | 676.4         | 824.5                   | 87.4          | 44.9                    | 103.7         | 140.8                   | 225.7         | 216.4                   |
|     | MAD                               | 1023.0        | 965.9                   | 31.6          | 34.1                    | 47.2          | 76.2                    | 128.0         | 112.6                   |
| 40  | Time-stability ( $\tilde{\tau}$ ) | <b>24.6</b>   | 86.5                    | <b>15.3</b>   | 22.3                    | 28.6          | <b>28.4</b>             | <b>22.8</b>   | 42.9                    |
|     | MAD                               | 30.2          | 17.6                    | 4.0           | 29.0                    | 8.8           | 6.3                     | 7.8           | 31.9                    |
|     | Total regret ( $\tilde{R}^T$ )    | 473.8         | 754.8                   | 80.7          | 53.8                    | 118.9         | 101.8                   | 137.8         | 165.0                   |
|     | MAD                               | 699.4         | 631.7                   | 20.5          | 50.3                    | 46.3          | 27.9                    | 45.6          | 77.6                    |
| 45  | Time-stability ( $\tilde{\tau}$ ) | <b>36.1</b>   | 86.6                    | <b>15.5</b>   | 35.8                    | <b>23.0</b>   | 30.5                    | <b>25.3</b>   | 46.8                    |
|     | MAD                               | 38.4          | 17.0                    | 5.2           | 40.8                    | 7.4           | 11.0                    | 6.9           | 30.6                    |
|     | Total regret ( $\tilde{R}^T$ )    | 739.2         | 942.7                   | 74.5          | 69.4                    | 91.1          | 104.9                   | 163.1         | 206.0                   |
|     | MAD                               | 979.6         | 873.2                   | 24.0          | 60.9                    | 31.9          | 43.3                    | 62.1          | 125.1                   |
| 50  | Time-stability ( $\tilde{\tau}$ ) | <b>29.4</b>   | 77.7                    | <b>24.3</b>   | 34.8                    | <b>24.6</b>   | 28.5                    | <b>22.4</b>   | 53.1                    |
|     | MAD                               | 34.3          | 30.7                    | 15.5          | 40.9                    | 7.4           | 9.4                     | 5.6           | 32.9                    |
|     | Total regret ( $\tilde{R}^T$ )    | 506.4         | 636.6                   | 222.4         | 197.1                   | 74.9          | 96.5                    | 122.0         | 179.4                   |
|     | MAD                               | 708.0         | 595.1                   | 263.5         | 265.9                   | 25.5          | 39.2                    | 41.0          | 68.9                    |

**Table 7** Average time-stability and MAD (in parenthesis) for  $\lambda_v^G \in \underline{\Lambda}_v^G$  and  $\pi_M^G \in \Pi_M^G$  policies (with value-imperfect feedback) when evader type is Random-0.5 on uniform random graphs with  $k = 6$  and  $T = 100$ . Note that a Random-0.5 evader randomly chooses from the shortest path and the second shortest path.

| $n$ |                                   | Right-skewed  |                         | Symmetric     |                         | Left-skewed   |                         | Random        |                         |
|-----|-----------------------------------|---------------|-------------------------|---------------|-------------------------|---------------|-------------------------|---------------|-------------------------|
|     |                                   | $\lambda_v^G$ | $\pi_M^G(+\mathcal{V})$ | $\lambda_v^G$ | $\pi_M^G(+\mathcal{V})$ | $\lambda_v^G$ | $\pi_M^G(+\mathcal{V})$ | $\lambda_v^G$ | $\pi_M^G(+\mathcal{V})$ |
| 15  | Time-stability ( $\tilde{\tau}$ ) | <b>20.9</b>   | 57.0                    | <b>13.5</b>   | 14.5                    | 20.1          | 19.1                    | <b>17.7</b>   | 45.3                    |
|     | MAD                               | 23.7          | 30.9                    | 6.3           | 19.1                    | 5.6           | 5.8                     | 5.2           | 33.2                    |
|     | Total regret ( $\tilde{R}^T$ )    | 570.5         | 738.6                   | 99.1          | 49.0                    | 163.4         | 134.4                   | 177.1         | 241.2                   |
|     | MAD                               | 855.2         | 820.1                   | 36.2          | 18.1                    | 56.9          | 42.4                    | 66.7          | 120.2                   |
| 20  | Time-stability ( $\tilde{\tau}$ ) | <b>30.7</b>   | 58.5                    | 17.1          | <b>16.6</b>             | <b>20.9</b>   | 26.6                    | <b>19.0</b>   | 28.2                    |
|     | MAD                               | 34.7          | 29.1                    | 6.8           | 17.5                    | 5.6           | 7.9                     | 5.4           | 22.2                    |
|     | Total regret ( $\tilde{R}^T$ )    | 912.0         | 1022.5                  | 113.0         | 55.1                    | 124.0         | 135.0                   | 153.3         | 163.1                   |
|     | MAD                               | 1285.0        | 1223.6                  | 42.9          | 31.3                    | 36.7          | 44.1                    | 61.8          | 97.3                    |
| 25  | Time-stability ( $\tilde{\tau}$ ) | <b>16.3</b>   | 47.6                    | 17.0          | <b>8.0</b>              | <b>23.8</b>   | 26.9                    | <b>23.4</b>   | 42.9                    |
|     | MAD                               | 16.8          | 24.8                    | 5.5           | 8.6                     | 6.1           | 8.2                     | 5.6           | 27.9                    |
|     | Total regret ( $\tilde{R}^T$ )    | 327.6         | 421.3                   | 109.9         | 36.8                    | 132.7         | 146.6                   | 165.1         | 268.4                   |
|     | MAD                               | 474.2         | 468.4                   | 42.5          | 19.8                    | 34.2          | 47.5                    | 44.3          | 184.2                   |
| 30  | Time-stability ( $\tilde{\tau}$ ) | <b>35.2</b>   | 68.8                    | <b>24.9</b>   | 28.8                    | <b>25.4</b>   | 30.7                    | <b>20.6</b>   | 36.2                    |
|     | MAD                               | 38.9          | 34.4                    | 16.6          | 32.1                    | 6.4           | 7.6                     | 4.8           | 21.4                    |
|     | Total regret ( $\tilde{R}^T$ )    | 844.7         | 932.0                   | 232.5         | 214.1                   | 109.9         | 118.3                   | 136.8         | 165.3                   |
|     | MAD                               | 1096.3        | 1056.8                  | 261.8         | 274.0                   | 31.6          | 35.2                    | 49.7          | 53.3                    |
| 35  | Time-stability ( $\tilde{\tau}$ ) | <b>25.7</b>   | 67.9                    | 16.0          | <b>15.3</b>             | <b>24.9</b>   | 31.0                    | <b>22.2</b>   | 45.5                    |
|     | MAD                               | 29.7          | 35.3                    | 5.0           | 20.0                    | 7.0           | 9.4                     | 5.6           | 23.2                    |
|     | Total regret ( $\tilde{R}^T$ )    | 594.5         | 703.0                   | 86.2          | 44.9                    | 122.2         | 138.4                   | 158.3         | 195.6                   |
|     | MAD                               | 871.4         | 829.1                   | 28.7          | 36.8                    | 56.4          | 52.7                    | 65.6          | 80.0                    |
| 40  | Time-stability ( $\tilde{\tau}$ ) | <b>25.1</b>   | 68.2                    | <b>15.3</b>   | 20.0                    | <b>24.1</b>   | 27.2                    | <b>21.7</b>   | 45.9                    |
|     | MAD                               | 30.0          | 31.8                    | 4.3           | 23.3                    | 5.4           | 10.1                    | 7.0           | 25.7                    |
|     | Total regret ( $\tilde{R}^T$ )    | 435.2         | 602.3                   | 68.8          | 51.4                    | 98.2          | 108.1                   | 127.9         | 172.0                   |
|     | MAD                               | 632.7         | 574.8                   | 17.7          | 42.5                    | 34.2          | 46.4                    | 48.2          | 80.0                    |
| 45  | Time-stability ( $\tilde{\tau}$ ) | <b>37.3</b>   | 71.3                    | <b>17.5</b>   | 25.6                    | <b>25.3</b>   | 33.0                    | <b>24.7</b>   | 39.5                    |
|     | MAD                               | 37.7          | 31.6                    | 5.2           | 25.6                    | 8.5           | 9.9                     | 5.7           | 21.4                    |
|     | Total regret ( $\tilde{R}^T$ )    | 643.5         | 768.0                   | 73.5          | 57.2                    | 104.2         | 118.5                   | 135.9         | 180.1                   |
|     | MAD                               | 832.5         | 771.3                   | 18.1          | 38.2                    | 47.4          | 45.3                    | 54.1          | 98.2                    |
| 50  | Time-stability ( $\tilde{\tau}$ ) | <b>26.2</b>   | 68.1                    | 29.9          | <b>28.9</b>             | <b>23.3</b>   | 28.2                    | <b>24.6</b>   | 37.5                    |
|     | MAD                               | 29.5          | 35.1                    | 14.3          | 31.4                    | 7.7           | 6.1                     | 7.6           | 20.1                    |
|     | Total regret ( $\tilde{R}^T$ )    | 372.2         | 482.7                   | 239.5         | 192.3                   | 77.6          | 89.2                    | 131.8         | 159.3                   |
|     | MAD                               | 518.8         | 459.0                   | 240.2         | 258.5                   | 31.5          | 27.3                    | 49.0          | 76.3                    |

## Appendix D: Computational Results for Layered Graphs

### D.1. Graph generation

We generate layered graphs using parameters  $(\theta, \phi)$ , where  $\phi$  and  $\theta$  denote the number of layers and nodes in each layer, respectively. We add a source node before the first layer and a destination node after the last layer. Thus, the total number of nodes is  $\theta \times \phi + 2$ . There is an arc from source node to all the nodes in the first layer and from all the nodes in the last layer to the destination node. Moreover, there is an arc with probability 0.5 from every node in layer  $i$  to nodes in layers  $i + 1, i + 2, \dots, \phi$ .

### D.2. Comparison of Policies without Information Updates

We compare policy performance when no information updates are used, i.e.,  $\mathcal{C}^t = \mathcal{C}^0$  for all periods  $t$ . We test policy performance using the right-skewed, symmetric, left-skewed and random cost structures on layered graphs. For each structure we randomly generate 20 instances with  $(\theta, \phi) = (7, 3)$ . Finally, we use  $k \in \{2, 4\}$ , and set either  $T = 500$  or  $T = 1000$ , respectively. Table 8 summarizes the results, which are similar to those for uniform random graphs, see Table 2.

### D.3. Improvements When Information Updates Are Applied

We consider layered graphs with 7 nodes ( $\theta = 7$ ) in each layer and number of layers  $\phi \in \{3, 4, \dots, 10\}$  for all four cost structures. We set  $T = 500$  and for each cost structure we randomly generate 20 instances. For response-imperfect feedback we set  $p_r = 0.5$ , and for value-imperfect feedback we set  $p_r = p_v = 0.5$ . Note that in this section and the following two sections, since we have polyhedral cost update mechanism, the approximate GRN policies are implemented. We measure policy performance using the average time-stability and MAD, see Table 9. As in Section 7.3, we observe that policy performance improves as more information revealed in the feedback. However, note that there is no significant improvement for policies in  $\Pi$ , even if the interdicator learns more information. On the other hand, GRN policies outperform mean bound policies under response- and value-imperfect feedback.

### D.4. Policy Performance: Sensitivity with Respect to $p_r$ and $p_v$

We set  $(\theta, \phi) = (7, 10)$  for all the experiments, and generate 20 instances with different cost structures (right-skewed, symmetric and left-skewed). Interdicator's resource limit and time horizon are set as  $k = 6$  and  $\mathcal{T} = \{0, 1, \dots, 50\}$ . Figure 9, 10 and 11 depict the behaviour of time-stability for response- and value-imperfect updates with the right-skewed, symmetric and left-skewed costs, respectively. As in the case of uniform random graphs in Section 7.4, performance of policies  $\underline{\Lambda}_r$  and  $\underline{\Lambda}_v$  improves as  $p_r$  and  $p_v$  increase. We observe that time-stability of policies  $\Lambda_v$  decreases faster than that of  $\Lambda_r$ .

### D.5. Policy Performance: Sensitivity with Respect to Quality of Arc Cost Bounds

We generate 20 instances for I.1, I.2 and I.3 as in Section 7.5, and set  $k = 6$ . Test instances are layered graphs with  $(\theta, \phi) = (7, 10)$  and we set  $T = 200$ . We test policy performance for various values of probabilities  $p_r$  and  $p_v$ . Table 10 summarizes the results obtained. There, we observe similar results to those presented in Section 7.5, which indicate that the quality of the initial bounds has a significant affect on policy performance.

**Table 8** Performance of policies in  $\Lambda$  and benchmark policies without information updates ( $7 \times 3$ , layered graphs, greedy evader).

| Graph        |                     | $k = 2$ ( $T = 500$ )    |                           |                           |                     | $k = 4$ ( $T = 1000$ )    |                           |                            |                     |
|--------------|---------------------|--------------------------|---------------------------|---------------------------|---------------------|---------------------------|---------------------------|----------------------------|---------------------|
|              |                     | $\lambda$                | $\pi_L$                   | $\pi_M$                   | $\pi_R$             | $\lambda$                 | $\pi_L$                   | $\pi_M$                    | $\pi_R$             |
| Right-skewed | Time-stability      | <b>82.0</b> <sup>1</sup> | 450.2 <sup>18</sup>       | 201.2 <sup>8</sup>        | 450.2 <sup>18</sup> | <b>445.3</b> <sup>7</sup> | 900.2 <sup>18</sup>       | 600.8 <sup>12</sup>        | 950.2 <sup>18</sup> |
|              | MAD                 | 116.1                    | 89.6                      | 239.0                     | 89.6                | 420.3                     | 179.6                     | 479.0                      | 94.7                |
|              | Relative difference | <b>0.2%</b>              | 18.5%                     | 3.7%                      | 18.2%               | <b>2.9%</b>               | 19.9%                     | 5.6%                       | 17.0%               |
|              | MAD                 | 0.3%                     | 11.9%                     | 4.4%                      | 12.6%               | 2.6%                      | 9.1%                      | 5.6%                       | 9.5%                |
|              | Total regret        | <b>242.3</b>             | 4925.0                    | 1025.0                    | 5082.5              | <b>2002.4</b>             | 12700.0                   | 3650.0                     | 11103.4             |
|              | MAD                 | 360.4                    | 3167.5                    | 1237.5                    | 3575.8              | 1973.0                    | 5140.0                    | 3680.0                     | 6306.9              |
| Symmetric    | Time-stability      | 381.6 <sup>12</sup>      | 350.6 <sup>14</sup>       | <b>133.4</b> <sup>4</sup> | 378.5 <sup>15</sup> | 946.4 <sup>17</sup>       | 900.2 <sup>18</sup>       | <b>153.2</b> <sup>3</sup>  | 691.2 <sup>14</sup> |
|              | MAD                 | 142.1                    | 209.2                     | 167.2                     | 182.3               | 91.1                      | 179.6                     | 246.5                      | 401.5               |
|              | Relative difference | 10.6%                    | 11.9%                     | <b>0.5%</b>               | 10.6%               | 17.4%                     | 15.3%                     | <b>0.3%</b>                | 10.5%               |
|              | MAD                 | 9.5%                     | 12.2%                     | 0.8%                      | 10.8%               | 8.4%                      | 11.3%                     | 0.6%                       | 9.5%                |
|              | Total regret        | 2343.3                   | 2450.0                    | <b>146.8</b>              | 2259.4              | 10055.2                   | 7750.0                    | <b>382.7</b>               | 5945.2              |
|              | MAD                 | 1516.7                   | 2580.0                    | 185.5                     | 2249.0              | 3969.8                    | 6025.0                    | 641.3                      | 4763.7              |
| Left-skewed  | Time-stability      | 411.9 <sup>15</sup>      | <b>151.4</b> <sup>6</sup> | 337.5 <sup>9</sup>        | 324.4 <sup>9</sup>  | 978.6 <sup>19</sup>       | <b>351.3</b> <sup>7</sup> | 867.6 <sup>15</sup>        | 876.0 <sup>16</sup> |
|              | MAD                 | 132.2                    | 209.2                     | 146.3                     | 165.7               | 40.8                      | 454.1                     | 206.9                      | 198.5               |
|              | Relative difference | 27.4%                    | <b>3.5%</b>               | 14.1%                     | 9.1%                | 34.4%                     | <b>3.2%</b>               | 19.4%                      | 22.2%               |
|              | MAD                 | 19.2%                    | 4.9%                      | 15.8%                     | 10.0%               | 13.5%                     | 4.3%                      | 15.7%                      | 18.8%               |
|              | Total regret        | 4085.8                   | <b>425.0</b>              | 2247.8                    | 2334.9              | 10635.1                   | <b>1050.0</b>             | 7860.9                     | 8042.5              |
|              | MAD                 | 2592.7                   | 595.0                     | 1377.0                    | 1811.9              | 3858.9                    | 1370.0                    | 3827.3                     | 5773.4              |
| Random       | Time-stability      | 425.2 <sup>15</sup>      | <b>226.1</b> <sup>9</sup> | 290.6 <sup>9</sup>        | 350.9 <sup>14</sup> | 974.1 <sup>19</sup>       | 850.3 <sup>17</sup>       | <b>781.2</b> <sup>14</sup> | 950.5 <sup>18</sup> |
|              | MAD                 | 115.3                    | 246.5                     | 189.9                     | 208.7               | 49.3                      | 254.5                     | 306.3                      | 94.1                |
|              | Relative difference | 29.5%                    | 9.0%                      | <b>8.1%</b>               | 14.8%               | 32.0%                     | 22.3%                     | <b>18.6%</b>               | 25.9%               |
|              | MAD                 | 18.9%                    | 10.4%                     | 9.2%                      | 12.6%               | 15.4%                     | 13.6%                     | 14.3%                      | 17.5%               |
|              | Total regret        | 4912.9                   | 1850.0                    | <b>1719.5</b>             | 2895.8              | 16014.8                   | 11600.0                   | <b>9979.1</b>              | 14468.1             |
|              | MAD                 | 2889.4                   | 2170.0                    | 1587.4                    | 2365.4              | 7935.9                    | 7500.0                    | 6205.8                     | 9943.2              |

Notes: Entries in bold denote the best policy in each setting; the numbers in superscript of time-stability denote the number of instances out of 20 for which the corresponding policy failed to converge within  $T$  time periods.

**Table 9 Average time-stability and MAD (in parenthesis) for  $\lambda \in \underline{\Delta}$  and  $\pi_M \in \Pi_M$  policies when information updates are used ( $k=6$ ,  $T=500$ , layered graphs, greedy evader).**

| Size          | Right-skewed                   |                |                      |                                 |                                | Symmetric                  |                               |                                     |                                 |                               | Left-skewed                |                               |                                    |                               |                               | Random                     |                               |                                    |                                |                                 |
|---------------|--------------------------------|----------------|----------------------|---------------------------------|--------------------------------|----------------------------|-------------------------------|-------------------------------------|---------------------------------|-------------------------------|----------------------------|-------------------------------|------------------------------------|-------------------------------|-------------------------------|----------------------------|-------------------------------|------------------------------------|--------------------------------|---------------------------------|
|               | $\lambda$                      | $\lambda_r$    | $\lambda_v$          | $\pi_M$                         | $\pi_M(+)$                     | $\lambda$                  | $\lambda_r$                   | $\lambda_v$                         | $\pi_M$                         | $\pi_M(+)$                    | $\lambda$                  | $\lambda_r$                   | $\lambda_v$                        | $\pi_M$                       | $\pi_M(+)$                    | $\lambda$                  | $\lambda_r$                   | $\lambda_v$                        | $\pi_M$                        | $\pi_M(+)$                      |
| $7 \times 3$  | 341.6 <sup>11</sup><br>(195.8) | 12.7<br>(5.6)  | <b>7.3</b><br>(2.4)  | 325.7 <sup>13</sup><br>(226.6)  | 325.7 <sup>13</sup><br>(226.6) | 500 <sup>20</sup><br>(0.0) | 31.3<br>(12.0)                | <b>19.2</b><br>(6.2)                | 226.9 <sup>7</sup><br>(232.7)   | 128.5 <sup>5</sup><br>(185.8) | 500 <sup>20</sup><br>(0.0) | 43.8<br>(19.9)                | <b>24.7</b><br>(6.7)               | 489.4 <sup>19</sup><br>(20.2) | 27.0<br>(6.0)                 | 500 <sup>20</sup><br>(0.0) | 37.5<br>(14.9)                | <b>23.0</b><br>(5.3)               | 330.1 <sup>17</sup><br>(208.6) | 329.16 <sup>13</sup><br>(222.2) |
| $7 \times 4$  | 383.2 <sup>15</sup><br>(175.2) | 11.4<br>(5.6)  | <b>8.5</b><br>(3.3)  | 375.5 <sup>15</sup><br>(186.8)  | 375.5 <sup>15</sup><br>(186.8) | 500 <sup>20</sup><br>(0.0) | 33.1<br>(12.0)                | <b>16.7</b><br>(6.0)                | 155.0 <sup>6</sup><br>(207.0)   | 176.6 <sup>7</sup><br>(226.4) | 500 <sup>20</sup><br>(0.0) | 39.1<br>(17.1)                | 33.6<br>(15.7)                     | 500 <sup>20</sup><br>(0.0)    | 31.6<br>(7.7)                 | 500 <sup>20</sup><br>(0.0) | 40.9<br>(13.8)                | <b>22.6</b><br>(4.9)               | 500 <sup>20</sup><br>(0.0)     | 282.3 <sup>11</sup><br>(239.5)  |
| $7 \times 5$  | 383.6 <sup>15</sup><br>(174.7) | 15.4<br>(8.5)  | <b>8.4</b><br>(3.4)  | 300.8 <sup>12</sup><br>(239.04) | 300.8 <sup>12</sup><br>(239.0) | 500 <sup>20</sup><br>(0.0) | 29.8<br>(15.4)                | <b>43.4</b> <sup>1</sup><br>(45.7)  | 281.9 <sup>11</sup><br>(239.91) | 153.3 <sup>6</sup><br>(208.0) | 500 <sup>20</sup><br>(0.0) | 43.2<br>(16.7)                | 50.0 <sup>1</sup><br>(45.0)        | 500 <sup>20</sup><br>(0.0)    | 29.7<br>(8.9)                 | 500 <sup>20</sup><br>(0.0) | 35.2<br>(9.7)                 | <b>24.4</b><br>(6.4)               | 500 <sup>20</sup><br>(0.0)     | 212.8 <sup>8</sup><br>(229.8)   |
| $7 \times 6$  | 345.7 <sup>13</sup><br>(200.7) | 13.5<br>(7.6)  | <b>11.6</b><br>(7.2) | 350.6 <sup>13</sup><br>(209.2)  | 350.6 <sup>14</sup><br>(209.2) | 500 <sup>20</sup><br>(0.0) | 60.1 <sup>1</sup><br>(45.1)   | <b>67.9</b> <sup>3</sup><br>(86.4)  | 308.5 <sup>11</sup><br>(229.9)  | 228.1 <sup>9</sup><br>(244.8) | 500 <sup>20</sup><br>(0.0) | 68.9 <sup>1</sup><br>(44.5)   | 36.1<br>(10.4)                     | 500 <sup>20</sup><br>(0.0)    | 34.1<br>(9.5)                 | 500 <sup>20</sup><br>(0.0) | 74.6 <sup>1</sup><br>(44.9)   | <b>52.1</b> <sup>1</sup><br>(47.5) | 500 <sup>20</sup><br>(0.0)     | 283.3 <sup>11</sup><br>(238.4)  |
| $7 \times 7$  | 430.2 <sup>16</sup><br>(117.3) | 17.9<br>(6.9)  | <b>14.7</b><br>(9.1) | 400.4 <sup>16</sup><br>(159.4)  | 400.4 <sup>16</sup><br>(159.4) | 500 <sup>20</sup><br>(0.0) | 55.9 <sup>1</sup><br>(47.0)   | <b>45.7</b> <sup>1</sup><br>(45.8)  | 259.8 <sup>9</sup><br>(240.2)   | 106.4 <sup>4</sup><br>(157.4) | 500 <sup>20</sup><br>(0.0) | 77.2 <sup>1</sup><br>(53.5)   | 76.8 <sup>2</sup><br>(84.7)        | 500 <sup>20</sup><br>(0.0)    | 37.5<br>(10.0)                | 500 <sup>20</sup><br>(0.0) | 73.2 <sup>1</sup><br>(46.7)   | <b>29.1</b><br>(5.5)               | 500 <sup>20</sup><br>(0.0)     | 307.8 <sup>12</sup><br>(230.7)  |
| $7 \times 8$  | 382.5 <sup>14</sup><br>(176.3) | 38.9<br>(46.1) | <b>9.2</b><br>(3.4)  | 350.6 <sup>15</sup><br>(209.2)  | 400.4 <sup>16</sup><br>(159.4) | 500 <sup>20</sup><br>(0.0) | 122.8 <sup>4</sup><br>(150.9) | <b>93.5</b> <sup>3</sup><br>(122.0) | 335.7 <sup>12</sup><br>(213.6)  | 231.4 <sup>9</sup><br>(241.7) | 500 <sup>20</sup><br>(0.0) | 53.6<br>(15.8)                | <b>28.1</b><br>(9.1)               | 500 <sup>20</sup><br>(0.0)    | 36.0<br>(11.7)                | 500 <sup>20</sup><br>(0.0) | 128.9 <sup>3</sup><br>(117.2) | <b>30.6</b><br>(6.3)               | 500 <sup>20</sup><br>(0.0)     | 190.6 <sup>7</sup><br>(216.6)   |
| $7 \times 9$  | 453.2 <sup>17</sup><br>(84.2)  | 22.8<br>(11.0) | <b>11.5</b><br>(3.3) | 325.7 <sup>13</sup><br>(226.6)  | 300.8 <sup>12</sup><br>(239.0) | 500 <sup>20</sup><br>(0.0) | 101.4 <sup>3</sup><br>(119.6) | <b>46.2</b><br>(45.4)               | 295.1 <sup>11</sup><br>(225.4)  | 82.4 <sup>3</sup><br>(125.3)  | 500 <sup>20</sup><br>(0.0) | 83.8 <sup>1</sup><br>(50.3)   | <b>31.6</b><br>(7.3)               | 500 <sup>20</sup><br>(0.0)    | 38.1<br>(9.0)                 | 500 <sup>20</sup><br>(0.0) | 41.8<br>(10.5)                | <b>53.0</b><br>(44.7)              | 500 <sup>20</sup><br>(0.0)     | 214.5 <sup>8</sup><br>(228.4)   |
| $7 \times 10$ | 379.0 <sup>15</sup><br>(181.6) | 11.1<br>(4.7)  | <b>8.4</b><br>(4.5)  | 400.4 <sup>16</sup><br>(159.4)  | 400.4 <sup>16</sup><br>(159.4) | 500 <sup>20</sup><br>(0.0) | 114.9 <sup>3</sup><br>(115.5) | <b>69.2</b> <sup>2</sup><br>(86.2)  | 299.0 <sup>10</sup><br>(221.2)  | 155.6 <sup>6</sup><br>(206.7) | 500 <sup>20</sup><br>(0.0) | 138.4 <sup>4</sup><br>(144.6) | <b>77.6</b> <sup>2</sup><br>(84.5) | 500 <sup>20</sup><br>(0.0)    | 107.5 <sup>3</sup><br>(117.8) | 500 <sup>20</sup><br>(0.0) | 46.5<br>(9.7)                 | <b>52.0</b> <sup>1</sup><br>(44.8) | 500 <sup>20</sup><br>(0.0)     | 166.9 <sup>8</sup><br>(199.9)   |

Note. The numbers in superscript of time-stability denote the number of instances out of 20 for which the corresponding policy failed to converge within  $T$  time periods.

**Figure 9** Average time-stability for policies in  $\underline{\Delta}$  for different types of feedback as  $p_r$  and  $p_v$  increase for  $k = 6$  and the right-skewed costs ( $T = 50$ , layered graphs, greedy evader).

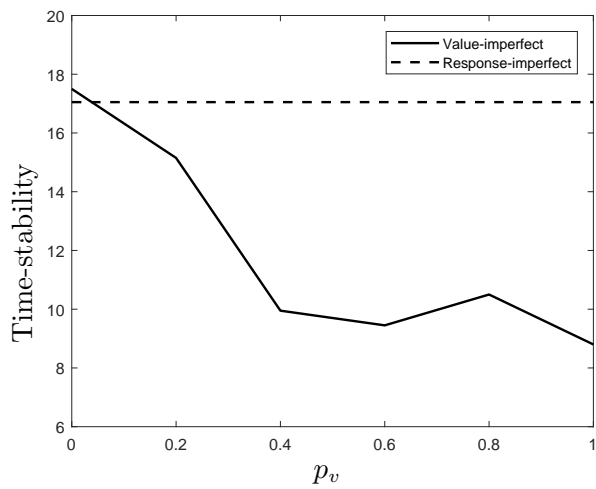

$p_r = 0.5$ ,  $p_v$  vs. time-stability, right-skewed

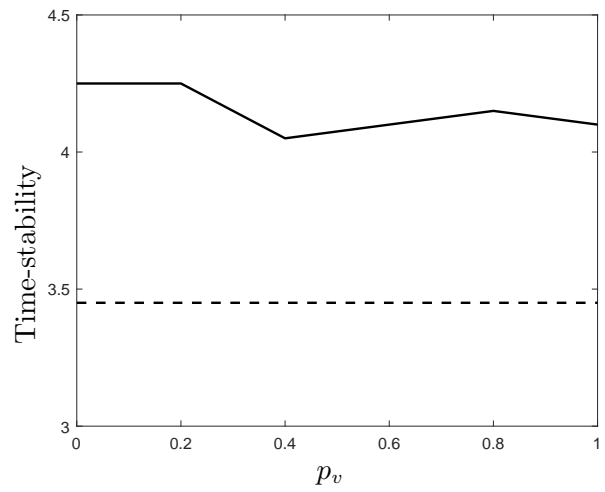

$p_r = 1.0$ ,  $p_v$  vs. time-stability, right-skewed

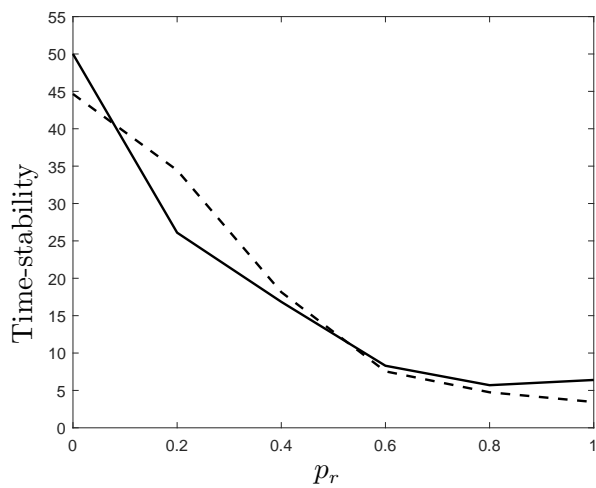

$p_v = 0.5$ ,  $p_r$  vs. time-stability, right-skewed

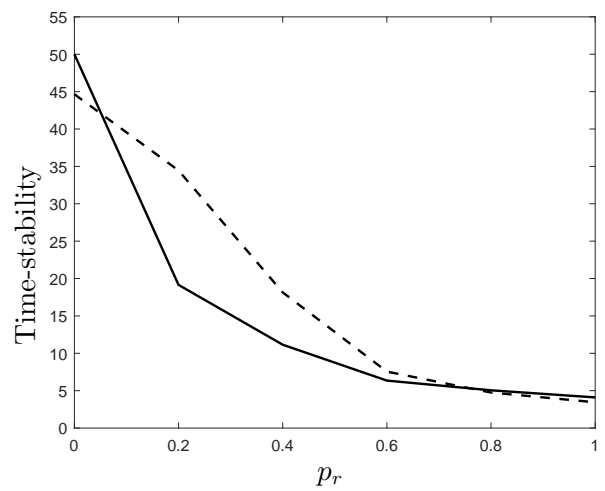

$p_v = 1.0$ ,  $p_r$  vs. time-stability, right-skewed

**Figure 10** Average time-stability for policies in  $\underline{\Lambda}$  for different types of feedback as  $p_r$  and  $p_v$  increase for  $k = 6$  and the symmetric costs ( $T = 50$ , layered graphs, greedy evader).

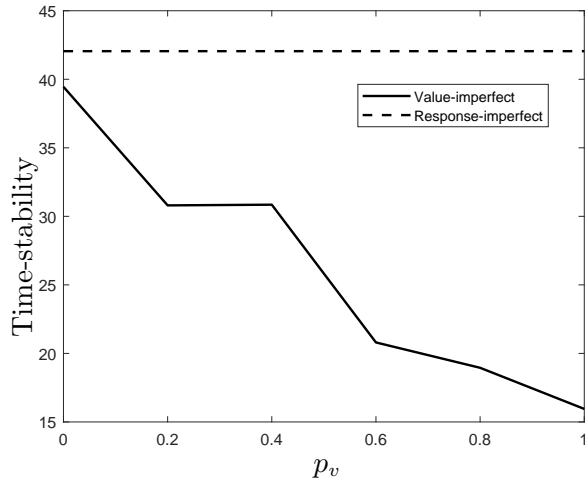

$p_r = 0.5$ ,  $p_v$  vs. time-stability, symmetric

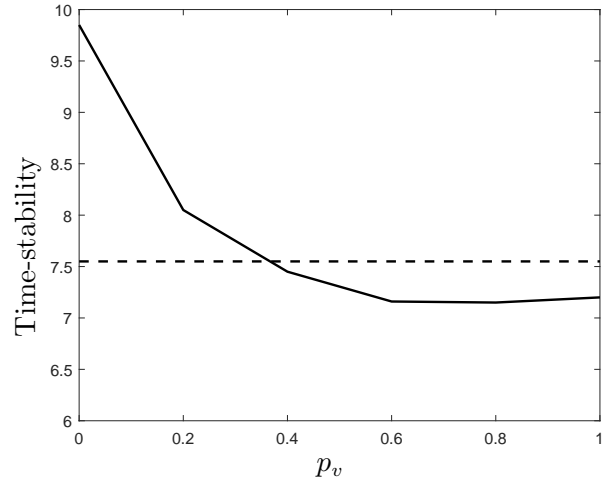

$p_r = 1.0$ ,  $p_v$  vs. time-stability, symmetric

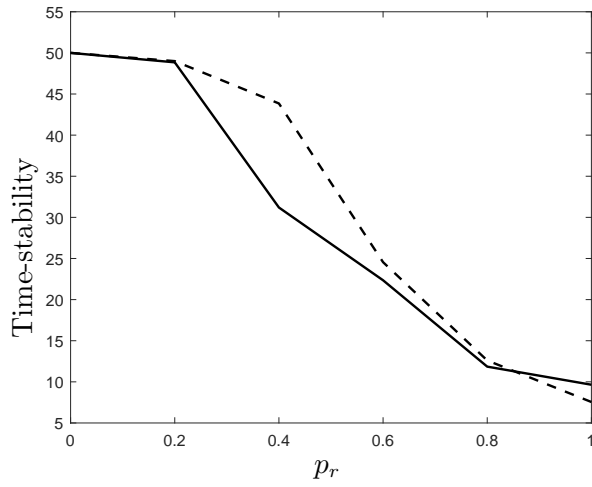

$p_v = 0.5$ ,  $p_r$  vs. time-stability, symmetric

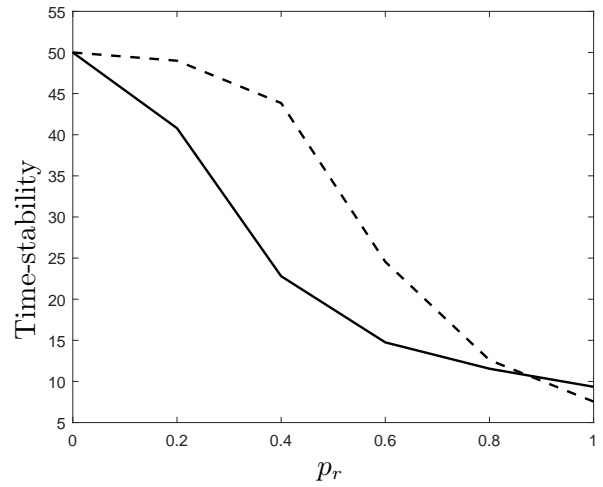

$p_v = 1.0$ ,  $p_r$  vs. time-stability, symmetric

**Figure 11** Average time-stability for policies in  $\underline{\Lambda}$  for different types of feedback as  $p_r$  and  $p_v$  increase for  $k = 6$  and the left-skewed costs ( $T = 50$ , layered graphs, greedy evader).

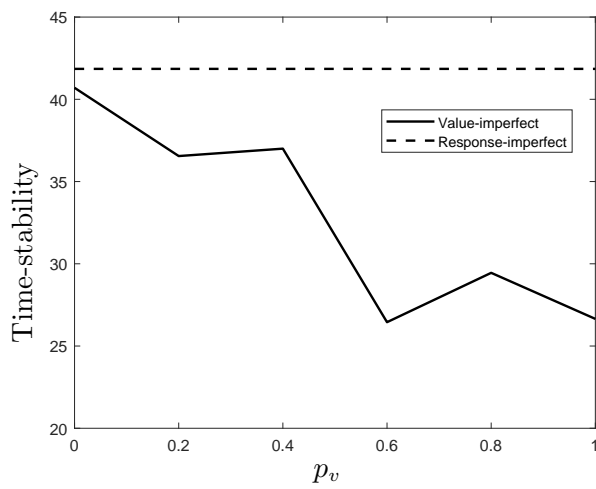

$p_r = 0.5$ ,  $p_v$  vs. time-stability, left-skewed

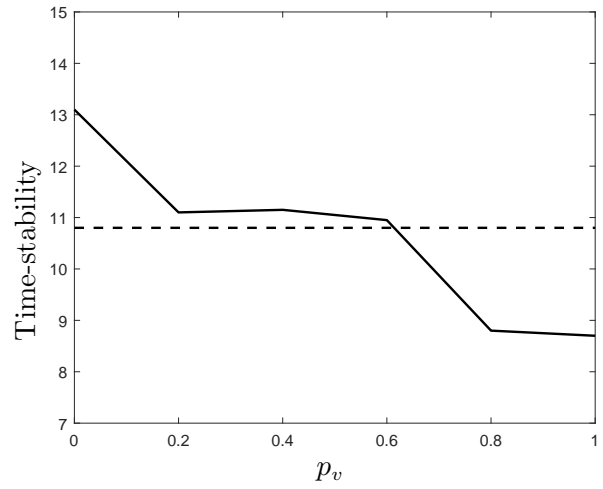

$p_r = 1.0$ ,  $p_v$  vs. time-stability, left-skewed

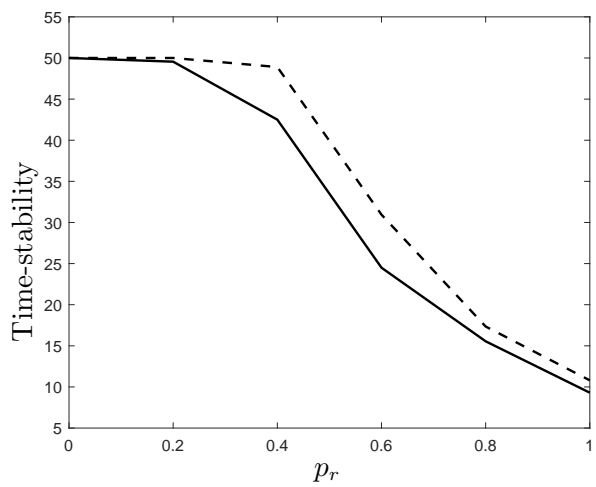

$p_v = 0.5$ ,  $p_r$  vs. time-stability, left-skewed

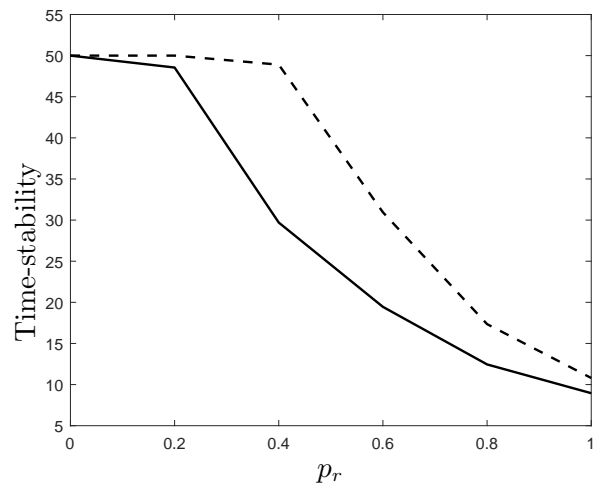

$p_v = 1.0$ ,  $p_r$  vs. time-stability, left-skewed

**Table 10** Behaviour of policies in  $\underline{\Delta}$  with respect to the cost bound quality ( $k = 6$ ,  $T = 200$ , layered graphs, greedy evader).

| $p_r = p_v$        |                | 0              | 0.1            | 0.2           | 0.3           | 0.4          | 0.5         | 0.6         | 0.7         | 0.8         | 0.9         | 1           |             |
|--------------------|----------------|----------------|----------------|---------------|---------------|--------------|-------------|-------------|-------------|-------------|-------------|-------------|-------------|
| Policy $\lambda_r$ | I.1            | Time-stability | <b>150.3</b>   | <b>107.1</b>  | <b>44.4</b>   | <b>19.0</b>  | <b>10.5</b> | <b>8.2</b>  | <b>6.1</b>  | <b>5.0</b>  | <b>4.1</b>  | <b>7.8</b>  | <b>2.7</b>  |
|                    |                | MAD            | 54.7           | 60.8          | 36.8          | 8.3          | 3.9         | 3.8         | 2.9         | 2.0         | 1.7         | 9.3         | 0.6         |
|                    | I.2            | Total regret   | <b>6102.0</b>  | <b>5447.0</b> | <b>3063.7</b> | <b>126.4</b> | <b>56.3</b> | <b>32.7</b> | <b>26.6</b> | <b>17.3</b> | <b>19.7</b> | <b>43.2</b> | <b>7.5</b>  |
|                    |                | MAD            | 5112.9         | 5995.8        | 4908.5        | 142.8        | 52.5        | 34.3        | 25.9        | 17.0        | 23.1        | 65.1        | 7.2         |
|                    | I.3            | Time-stability | 193.3          | 181.0         | 112.7         | 53.6         | 31.3        | 15.3        | 12.4        | 14.0        | 11.8        | 15.6        | 4.9         |
|                    |                | MAD            | 12.8           | 30.5          | 58.0          | 26.9         | 14.4        | 6.6         | 4.0         | 10.3        | 9.7         | 18.0        | 1.1         |
| I.3                | Total regret   | 13827.2        | 12969.3        | 8212.0        | 2822.1        | 1632.5       | 658.1       | 575.2       | 582.5       | 610.3       | 567.9       | 183.2       |             |
|                    | MAD            | 9674.3         | 7633.7         | 6920.5        | 2336.6        | 1251.9       | 460.8       | 446.1       | 422.9       | 601.8       | 621.1       | 113.1       |             |
| Policy $\lambda_v$ | I.1            | Time-stability | <b>161.5</b>   | <b>75.4</b>   | <b>28.8</b>   | <b>13.1</b>  | <b>6.6</b>  | <b>6.2</b>  | <b>4.9</b>  | <b>4.3</b>  | <b>4.4</b>  | <b>3.5</b>  | <b>3.2</b>  |
|                    |                | MAD            | 57.8           | 55.2          | 16.5          | 7.0          | 2.7         | 2.7         | 2.0         | 1.7         | 1.3         | 1.3         | 1.1         |
|                    | I.2            | Total regret   | <b>12643.3</b> | <b>3461.0</b> | <b>361.0</b>  | <b>53.2</b>  | <b>38.5</b> | <b>28.6</b> | <b>17.0</b> | <b>18.7</b> | <b>19.7</b> | <b>17.7</b> | <b>16.6</b> |
|                    |                | MAD            | 12171.1        | 4513.4        | 417.7         | 58.4         | 39.6        | 27.1        | 16.6        | 19.8        | 20.0        | 19.4        | 17.8        |
|                    | I.2            | Time-stability | 193.3          | 163.9         | 81.6          | 30.8         | 17.6        | 20.3        | 9.5         | 8.1         | 15.7        | 5.4         | 4.9         |
|                    |                | MAD            | 12.8           | 49.0          | 51.2          | 15.5         | 6.5         | 18.0        | 3.4         | 2.9         | 18.4        | 1.3         | 1.2         |
| I.3                | Total regret   | 13894.5        | 9782.2         | 5299.3        | 1174.7        | 691.5        | 968.0       | 317.4       | 327.8       | 573.2       | 189.0       | 171.3       |             |
|                    | MAD            | 8683.5         | 5049.2         | 5479.6        | 934.9         | 380.5        | 1181.5      | 196.9       | 238.3       | 667.4       | 119.4       | 102.0       |             |
| I.3                | Time-stability | 200.0          | 197.3          | 123.3         | 49.2          | 29.1         | 30.6        | 15.7        | 21.9        | 9.9         | 8.6         | 7.1         |             |
|                    | MAD            | 0.0            | 5.0            | 29.8          | 12.0          | 6.0          | 18.0        | 3.5         | 17.8        | 1.4         | 0.9         | 0.1         |             |
| I.3                | Total regret   | 33589.3        | 22066.9        | 11660.3       | 4200.6        | 2533.7       | 2043.9      | 1333.5      | 1285.0      | 795.4       | 637.6       | 546.4       |             |
|                    | MAD            | 13519.1        | 9613.6         | 4940.6        | 1440.0        | 1143.8       | 956.6       | 611.9       | 809.8       | 345.0       | 262.4       | 208.9       |             |

Note. The numbers in superscript of time-stability denote the number of instances out of 20 for which the corresponding policy failed to converge within  $T$  time periods

## Appendix E: Computational Results for Watts-Strogatz Graphs

### E.1. Graph generation

We generate Watts-Strogatz graphs following the model in Watts and Strogatz (1998), using parameters  $(n, d, \beta)$ . Mean degree of nodes and rewiring probability are denoted as  $d$  and  $\beta$ , respectively. Note that  $\beta$  denotes the graph instances' degree of randomness. Through all the experiments, we set  $\beta = 1$ .

### E.2. Comparison of Policies without Information Updates

For each structure we randomly generate 20 instances with  $(n, d) = (15, 8)$ . Finally, we have  $k \in \{2, 4\}$ , and use  $T \in \{500, 1000\}$ . Table 11 summarizes the results, which are similar to those for uniform random and layered graphs, see Table 2 and Table 8, respectively.

### E.3. Improvements When Information Updates Are Applied

We consider Watts-Strogatz graphs with

$$(n, d) \in \{(15, 8), (20, 15), (25, 14), (30, 16), (35, 22), (40, 22), (45, 28), (50, 30)\},$$

for all four cost structures. We set  $T = 500$  and for each cost structure we randomly generate 20 instances. For response-imperfect feedback we set  $p_r = 0.5$ , and in value-imperfect feedback we set  $p_r = p_v = 0.5$ . Note that similar in Appendix D in the Online Supplement, in this section and the following two sections, since we have polyhedral cost update mechanism, the approximate GRN policies are implemented. Table 12 depicts our results, which are similar to those obtained for uniform random and layered graphs.

### E.4. Policy Performance: Sensitivity with Respect to $p_r$ and $p_v$

We set  $(n, d) = (50, 30)$  for all the experiments, and generate 20 instances with different cost structures (right-skewed, symmetric and left-skewed). Interdictor's resource limit and time horizon are set as  $k = 6$  and  $\mathcal{T} = \{0, 1, \dots, 50\}$ . Figure 12, 13 and 14 depict the behaviour of time-stability for response- and value-imperfect updates with the right-skewed, symmetric and left-skewed costs, respectively.

### E.5. Policy Performance: Sensitivity with Respect to Quality of Arc Cost Bounds

We generate 20 instances for I.1, I.2 and I.3 as in Section 7.5, and set  $k = 6$ . We set  $(n, d) = (50, 30)$  and  $T = 200$ . We test policy performance for various values of probabilities  $p_r$  and  $p_v$ . Table 13 summarizes the results obtained, which are similar results to those in Section 7.5 and Appendix D.5 in the Online Supplement.

**Table 11** Performance of policies in  $\Lambda$  and benchmark policies without information updates ( $n = 15$ , Watts-Strogatz graphs, greedy evader).

| Graph        |                     | $k = 2$ ( $T = 500$ ) |                     |                           |                          | $k = 4$ ( $T = 1000$ )    |                           |                           |                     |
|--------------|---------------------|-----------------------|---------------------|---------------------------|--------------------------|---------------------------|---------------------------|---------------------------|---------------------|
|              |                     | $\lambda$             | $\pi_L$             | $\pi_M$                   | $\pi_R$                  | $\lambda$                 | $\pi_L$                   | $\pi_M$                   | $\pi_R$             |
| Right-skewed | Time-stability      | <b>28.4</b>           | 325.7 <sup>13</sup> | 101.6 <sup>5</sup>        | 400.4 <sup>16</sup>      | <b>280.0</b> <sup>3</sup> | 850.3 <sup>17</sup>       | 311.8 <sup>8</sup>        | 850.6 <sup>17</sup> |
|              | MAD                 | 37.8                  | 226.6               | 159.4                     | 159.4                    | 303.2                     | 254.5                     | 412.9                     | 254.1               |
|              | Relative difference | <b>0.0%</b>           | 13.8%               | 3.4%                      | 17.9%                    | <b>1.4%</b>               | 23.2%                     | 1.9%                      | 21.0%               |
|              | MAD                 | 0.0%                  | 12.6%               | 5.3%                      | 11.8%                    | 2.4%                      | 11.3%                     | 2.1%                      | 12.4%               |
|              | Total regret        | <b>90.9</b>           | 3775.0              | 875.0                     | 4978.4                   | <b>1629.1</b>             | 17050.0                   | 1772.4                    | 15650.2             |
|              | MAD                 | 145.2                 | 3425.0              | 1350.0                    | 3328.4                   | 1997.1                    | 8255.0                    | 1949.6                    | 9414.9              |
| Symmetric    | Time-stability      | 182.0 <sup>4</sup>    | 375.5 <sup>15</sup> | <b>87.3</b> <sup>3</sup>  | 195.2 <sup>7</sup>       | 843.9 <sup>15</sup>       | 800.4 <sup>16</sup>       | <b>178.5</b> <sup>3</sup> | 690.0 <sup>12</sup> |
|              | MAD                 | 143.2                 | 186.8               | 135.3                     | 220.7                    | 234.2                     | 319.4                     | 267.5                     | 412.4               |
|              | Relative difference | 2.6%                  | 14.1%               | <b>0.6%</b>               | 4.7%                     | 14.9%                     | 13.9%                     | <b>1.0%</b>               | 10.2%               |
|              | MAD                 | 4.2%                  | 13.2%               | 1.0%                      | 6.1%                     | 11.2%                     | 9.0%                      | 1.7%                      | 8.9%                |
|              | Total regret        | 749.2                 | 3025.0              | <b>155.4</b>              | 1048.9                   | 8347.9                    | 7350.0                    | <b>655.9</b>              | 5715.5              |
|              | MAD                 | 622.0                 | 2935.0              | 247.1                     | 1263.6                   | 4912.7                    | 4985.0                    | 973.4                     | 4588.0              |
| Left-skewed  | Time-stability      | 315.4 <sup>10</sup>   | 176.3 <sup>7</sup>  | 246.2 <sup>7</sup>        | <b>88.6</b> <sup>1</sup> | 1000.0 <sup>20</sup>      | <b>401.2</b> <sup>8</sup> | 702.2 <sup>13</sup>       | 723.7 <sup>13</sup> |
|              | MAD                 | 184.6                 | 226.6               | 191.8                     | 99.4                     | 0.0                       | 479.0                     | 387.2                     | 359.2               |
|              | Relative difference | 12.4%                 | 4.9%                | 7.6%                      | <b>0.5%</b>              | 33.9%                     | <b>5.2%</b>               | 18.6%                     | 13.1%               |
|              | MAD                 | 13.2%                 | 6.3%                | 9.9%                      | 1.0%                     | 13.2%                     | 6.6%                      | 14.3%                     | 13.3%               |
|              | Total regret        | 2362.7                | 850.0               | 1543.6                    | <b>646.0</b>             | 14373.8                   | <b>2150.0</b>             | 7452.3                    | 6734.9              |
|              | MAD                 | 1687.4                | 1105.0              | 1373.7                    | 798.4                    | 6177.3                    | 2710.0                    | 4383.1                    | 4523.3              |
| Random       | Time-stability      | 281.4 <sup>9</sup>    | 350.6 <sup>17</sup> | <b>216.6</b> <sup>7</sup> | 301.6 <sup>12</sup>      | 940.9 <sup>18</sup>       | 900.2 <sup>18</sup>       | <b>342.2</b> <sup>6</sup> | 751.1 <sup>15</sup> |
|              | MAD                 | 196.8                 | 209.2               | 206.0                     | 238.1                    | 106.4                     | 179.6                     | 404.1                     | 373.4               |
|              | Relative difference | 10.7%                 | 15.8%               | <b>4.5%</b>               | 11.4%                    | 31.6%                     | 20.3%                     | <b>5.0%</b>               | 15.1%               |
|              | MAD                 | 12.8%                 | 8.8%                | 6.1%                      | 12.1%                    | 10.9%                     | 10.9%                     | 7.1%                      | 13.9%               |
|              | Total regret        | 2715.5                | 3250.0              | <b>1293.3</b>             | 2540.2                   | 16614.3                   | 11900.0                   | <b>2985.4</b>             | 9675.5              |
|              | MAD                 | 2411.5                | 1925.0              | 1442.2                    | 2825.9                   | 4588.5                    | 7190.0                    | 3706.1                    | 8355.2              |

Notes: Entries in bold denote the best policy in each setting; the numbers in superscript of time-stability denote the number of instances out of 20 for which the corresponding policy failed to converge within  $T$  time periods.

**Table 12 Average time-stability and MAD (in parenthesis) for  $\lambda \in \underline{\Lambda}$  and  $\pi_M \in \Pi_M$  policies when information updates are used ( $k=6$ ,  $T=500$ , Watts-Strogatz graphs, greedy evader).**

| $n$ | Right-skewed     |                |                       |                  |                       | Symmetric      |                  |                       |                  |                       | Left-skewed    |                |                       |                |                       | Random         |                 |                       |                  |                       |
|-----|------------------|----------------|-----------------------|------------------|-----------------------|----------------|------------------|-----------------------|------------------|-----------------------|----------------|----------------|-----------------------|----------------|-----------------------|----------------|-----------------|-----------------------|------------------|-----------------------|
|     | $\lambda$        | $\lambda_r$    | $\lambda_v$           | $\pi_M$          | $\pi_M(+\mathcal{V})$ | $\lambda$      | $\lambda_r$      | $\lambda_v$           | $\pi_M$          | $\pi_M(+\mathcal{V})$ | $\lambda$      | $\lambda_r$    | $\lambda_v$           | $\pi_M$        | $\pi_M(+\mathcal{V})$ | $\lambda$      | $\lambda_r$     | $\lambda_v$           | $\pi_M$          | $\pi_M(+\mathcal{V})$ |
| 15  | 218.6<br>(211.2) | 36.6<br>(11.0) | <b>20.3</b><br>(26.5) | 215.4<br>(243.9) | 251.0<br>(249.0)      | 500.0<br>(0.0) | 66.3<br>(8.5)    | <b>15.1</b><br>(3.6)  | 74.2<br>(121.7)  | 123.0<br>(170.0)      | 500.0<br>(0.0) | 82.1<br>(4.8)  | <b>68.6</b><br>(79.5) | 500.0<br>(0.0) | 157.0<br>(196.0)      | 500.0<br>(0.0) | 89.8<br>(9.1)   | <b>20.8</b><br>(8.4)  | 364.7<br>(193.3) | 337.6<br>(208.8)      |
| 20  | 363.4<br>(191.3) | 41.5<br>(54.3) | <b>32.8</b><br>(46.7) | 251.0<br>(249.0) | 251.0<br>(249.0)      | 500.0<br>(0.0) | 123.5<br>(149.2) | <b>18.8</b><br>(5.1)  | 152.0<br>(208.8) | 103.5<br>(158.6)      | 500.0<br>(0.0) | 72.5<br>(47.6) | <b>48.9</b><br>(45.1) | 500.0<br>(0.0) | 202.4<br>(208.3)      | 500.0<br>(0.0) | 94.6<br>(84.0)  | <b>53.0</b><br>(54.8) | 410.1<br>(143.9) | 354.5<br>(203.7)      |
| 25  | 347.2<br>(200.3) | 43.1<br>(45.8) | <b>11.1</b><br>(4.1)  | 251.0<br>(249.0) | 251.0<br>(249.0)      | 500.0<br>(0.0) | 59.5<br>(45.9)   | <b>45.0</b><br>(45.5) | 220.9<br>(231.2) | 61.1<br>(87.8)        | 500.0<br>(0.0) | 61.6<br>(21.4) | <b>26.8</b><br>(4.9)  | 500.0<br>(0.0) | 143.3<br>(156.3)      | 500.0<br>(0.0) | 58.4<br>(22.3)  | <b>52.6</b><br>(44.7) | 476.8<br>(44.2)  | 333.3<br>(216.7)      |
| 30  | 475.8<br>(46.1)  | 41.3<br>(47.9) | <b>9.9</b><br>(2.9)   | 275.9<br>(246.5) | 275.9<br>(246.5)      | 500.0<br>(0.0) | 43.4<br>(23.1)   | <b>19.7</b><br>(5.6)  | 129.7<br>(185.2) | 153.1<br>(208.1)      | 500.0<br>(0.0) | 63.4<br>(27.2) | <b>26.7</b><br>(6.0)  | 500.0<br>(0.0) | 128.5<br>(148.6)      | 500.0<br>(0.0) | 61.7<br>(21.7)  | <b>28.2</b><br>(7.7)  | 452.1<br>(81.5)  | 354.0<br>(204.4)      |
| 35  | 428.9<br>(121.0) | 21.0<br>(10.7) | <b>10.1</b><br>(4.0)  | 350.6<br>(209.2) | 375.5<br>(186.8)      | 500.0<br>(0.0) | 61.4<br>(44.1)   | <b>21.2</b><br>(5.1)  | 257.1<br>(242.9) | 179.4<br>(224.5)      | 500.0<br>(0.0) | 72.8<br>(34.3) | <b>37.4</b><br>(9.1)  | 500.0<br>(0.0) | 180.8<br>(191.5)      | 500.0<br>(0.0) | 50.5<br>(18.9)  | <b>29.6</b><br>(7.2)  | 479.6<br>(38.9)  | 253.3<br>(233.8)      |
| 40  | 427.4<br>(123.5) | 73.7<br>(85.3) | <b>60.1</b><br>(88.0) | 375.5<br>(186.8) | 350.6<br>(209.2)      | 500.0<br>(0.0) | 38.2<br>(9.8)    | <b>25.6</b><br>(6.4)  | 159.5<br>(204.3) | 80.9<br>(125.7)       | 500.0<br>(0.0) | 90.1<br>(53.2) | <b>56.4</b><br>(44.4) | 500.0<br>(0.0) | 223.8<br>(221.0)      | 500.0<br>(0.0) | 98.0<br>(82.5)  | <b>75.9</b><br>(84.8) | 500.0<br>(0.0)   | 236.2<br>(237.4)      |
| 45  | 377.9<br>(183.2) | 46.7<br>(47.0) | <b>10.3</b><br>(3.4)  | 350.6<br>(209.2) | 350.6<br>(209.2)      | 500.0<br>(0.0) | 65.6<br>(48.8)   | <b>48.3</b><br>(45.4) | 304.0<br>(235.3) | 83.2<br>(125.0)       | 500.0<br>(0.0) | 93.6<br>(53.7) | <b>62.7</b><br>(45.8) | 500.0<br>(0.0) | 271.1<br>(228.9)      | 500.0<br>(0.0) | 94.9<br>(49.4)  | <b>35.5</b><br>(6.7)  | 500.0<br>(0.0)   | 288.1<br>(233.1)      |
| 50  | 403.0<br>(155.2) | 17.0<br>(5.7)  | <b>11.5</b><br>(3.1)  | 400.4<br>(159.4) | 400.4<br>(159.4)      | 500.0<br>(0.0) | 70.3<br>(50.4)   | <b>21.4</b><br>(4.8)  | 205.6<br>(235.5) | 276.9<br>(245.5)      | 500.0<br>(0.0) | 93.1<br>(51.7) | <b>34.0</b><br>(7.6)  | 500.0<br>(0.0) | 270.9<br>(229.2)      | 500.0<br>(0.0) | 111.7<br>(78.5) | <b>31.2</b><br>(7.9)  | 500.0<br>(0.0)   | 358.0<br>(198.9)      |

Note. The numbers in superscript of time-stability denote the number of instances out of 20 for which the corresponding policy failed to converge within  $T$  time periods.

**Figure 12** Average time-stability for policies in  $\underline{\Lambda}$  for different types of feedback as  $p_r$  and  $p_v$  increase for  $k = 6$  and the right-skewed costs ( $T = 50$ , Watts-Strogatz graphs, greedy evader).

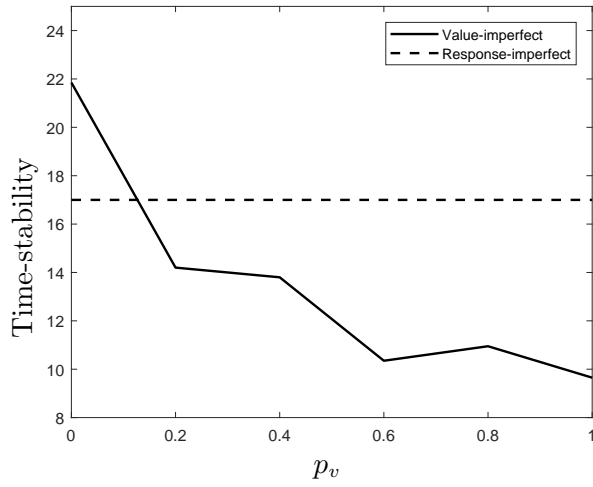

$p_r = 0.5$ ,  $p_v$  vs. time-stability, right-skewed

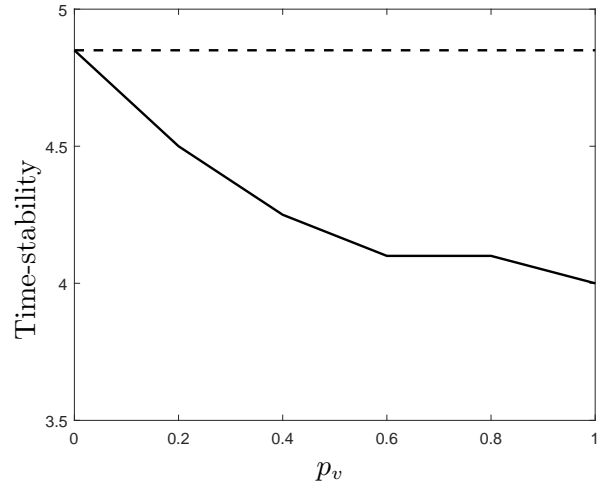

$p_r = 1.0$ ,  $p_v$  vs. time-stability, right-skewed

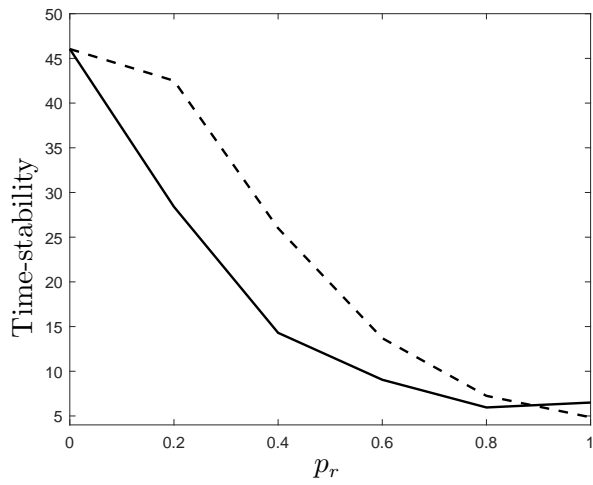

$p_v = 0.5$ ,  $p_r$  vs. time-stability, right-skewed

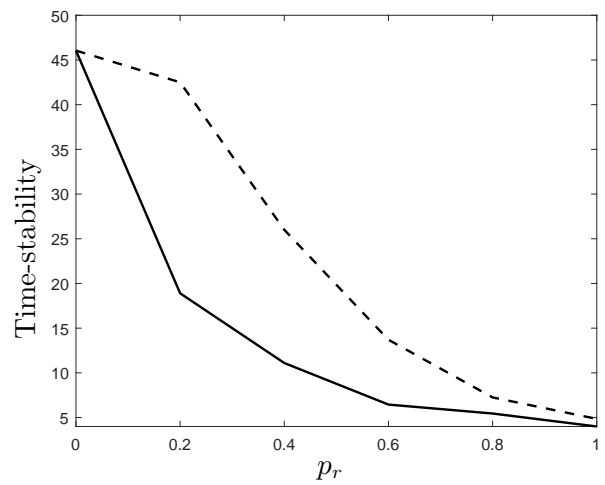

$p_v = 1.0$ ,  $p_r$  vs. time-stability, right-skewed

**Figure 13** Average time-stability for policies in  $\underline{\Lambda}$  for different types of feedback as  $p_r$  and  $p_v$  increase for  $k = 6$  and the symmetric costs ( $T = 50$ , Watts-Strogatz graphs, greedy evader).

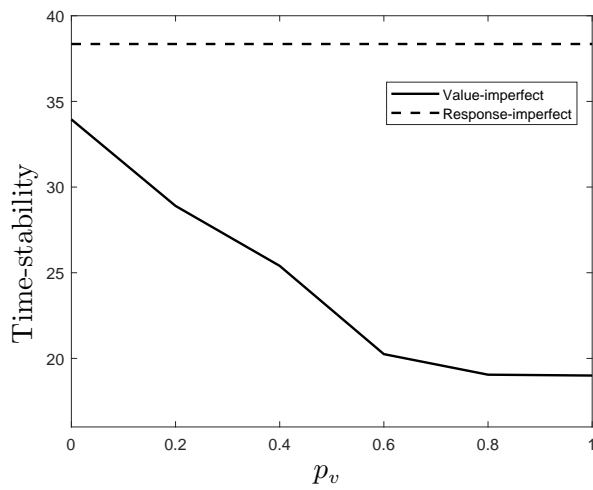

$p_r = 0.5, p_v$  vs. time-stability, symmetric

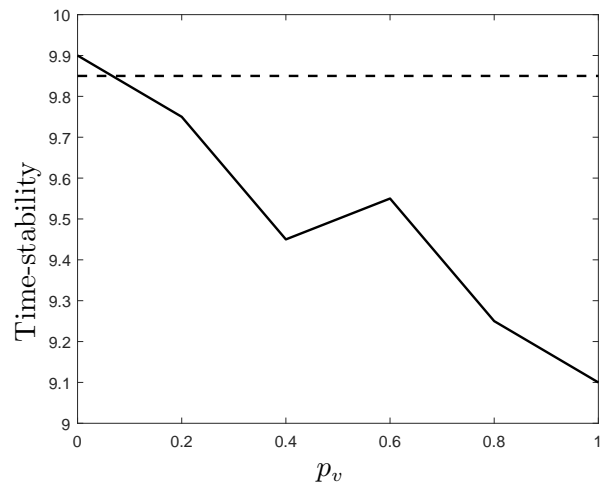

$p_r = 1.0, p_v$  vs. time-stability, symmetric

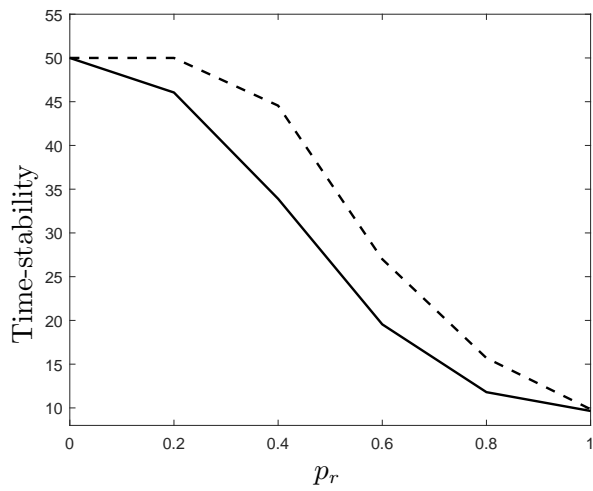

$p_v = 0.5, p_r$  vs. time-stability, symmetric

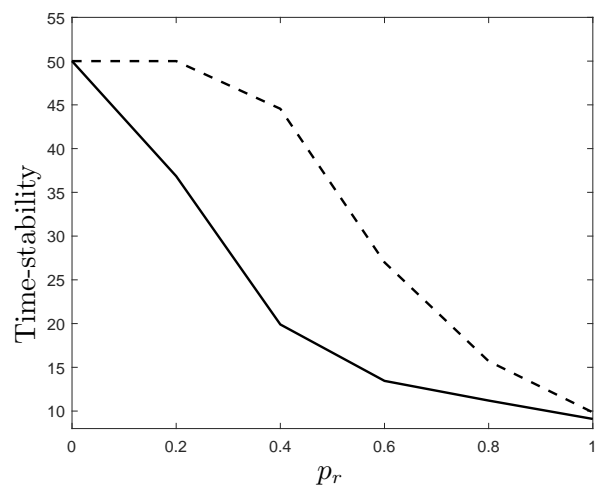

$p_v = 1.0, p_r$  vs. time-stability, symmetric

**Figure 14** Average time-stability for policies in  $\underline{\Lambda}$  for different types of feedback as  $p_r$  and  $p_v$  increase for  $k = 6$  and the left-skewed costs ( $T = 50$ , Watts-Strogatz graphs, greedy evader).

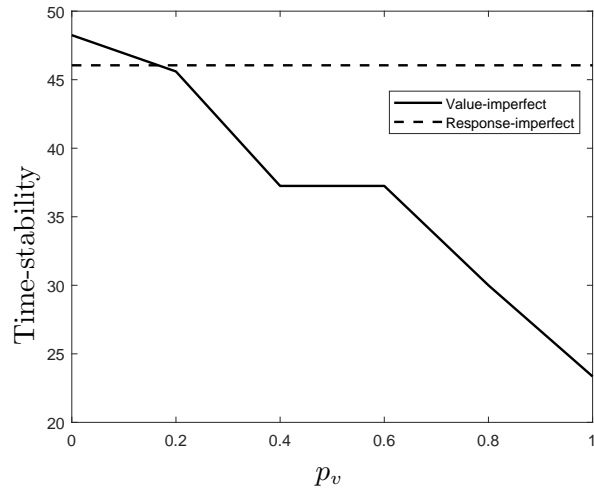

$p_r = 0.5$ ,  $p_v$  vs. time-stability, left-skewed

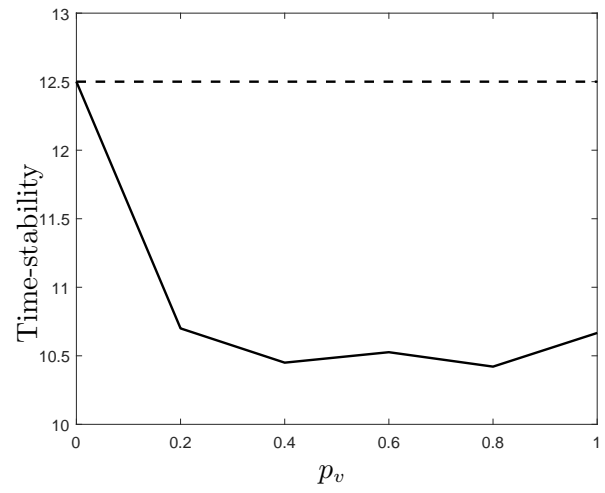

$p_r = 1.0$ ,  $p_v$  vs. time-stability, left-skewed

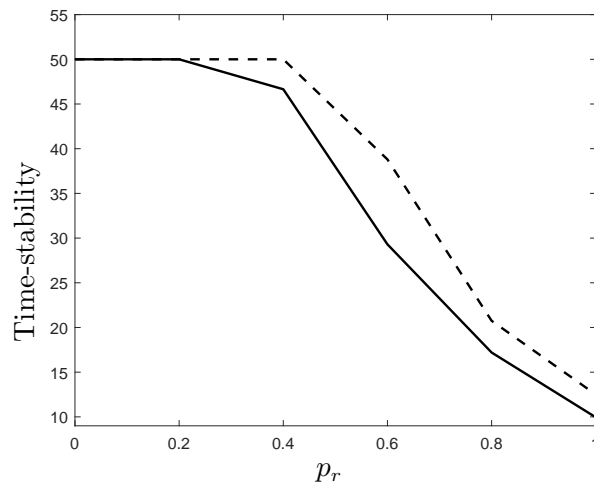

$p_v = 0.5$ ,  $p_r$  vs. time-stability, left-skewed

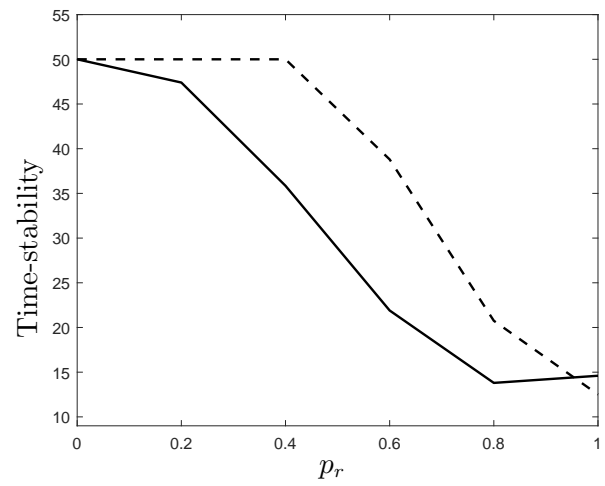

$p_v = 1.0$ ,  $p_r$  vs. time-stability, left-skewed

**Table 13** Behaviour of policies in  $\underline{\Delta}$  with respect to the cost bound quality ( $k = 6$ ,  $T = 200$ , Watts-Strogatz graphs, greedy evader).

| $p_r = p_v$        |     | 0              | 0.1           | 0.2           | 0.3          | 0.4          | 0.5          | 0.6         | 0.7         | 0.8         | 0.9        | 1          |            |
|--------------------|-----|----------------|---------------|---------------|--------------|--------------|--------------|-------------|-------------|-------------|------------|------------|------------|
| Policy $\lambda_r$ | I.1 | Time-stability | <b>105.5</b>  | <b>77.2</b>   | <b>31.6</b>  | <b>16.3</b>  | <b>12.4</b>  | <b>6.4</b>  | <b>5.8</b>  | <b>3.6</b>  | <b>3.6</b> | <b>2.7</b> | <b>2.5</b> |
|                    |     | MAD            | 70.1          | 65.3          | 17.3         | 7.7          | 7.8          | 3.0         | 2.5         | 1.4         | 1.4        | 0.8        | 0.6        |
|                    | I.2 | Total regret   | <b>1572.6</b> | <b>909.9</b>  | <b>390.3</b> | <b>236.4</b> | <b>151.6</b> | <b>19.6</b> | <b>18.0</b> | <b>10.7</b> | <b>6.7</b> | <b>7.1</b> | <b>5.2</b> |
|                    |     | MAD            | 2193.9        | 1306.2        | 600.4        | 338.4        | 217.5        | 27.0        | 25.3        | 15.4        | 9.1        | 10.1       | 7.1        |
|                    | I.3 | Time-stability | 200.0         | 151.6         | 84.6         | 41.5         | 21.3         | 17.3        | 9.0         | 7.8         | 6.3        | 5.1        | 4.3        |
|                    |     | MAD            | 0.0           | 48.2          | 44.2         | 21.7         | 6.5          | 12.3        | 2.7         | 2.4         | 1.6        | 1.2        | 0.8        |
|                    | I.1 | Total regret   | 10297.9       | 9986.2        | 5490.7       | 1881.5       | 832.8        | 852.7       | 350.9       | 268.7       | 202.4      | 158.5      | 126.2      |
|                    |     | MAD            | 6342.5        | 7238.2        | 4813.5       | 1731.2       | 490.5        | 946.4       | 265.6       | 190.0       | 139.6      | 98.0       | 76.3       |
|                    | I.2 | Time-stability | 200.0         | 200.0         | 138.9        | 81.6         | 46.2         | 29.7        | 22.6        | 20.1        | 11.6       | 8.1        | 7.0        |
|                    |     | MAD            | 0.0           | 0.0           | 39.7         | 31.4         | 18.7         | 13.4        | 11.9        | 10.4        | 2.1        | 0.7        | 0.0        |
|                    | I.3 | Total regret   | 27668.4       | 20968.8       | 14129.3      | 7069.2       | 3950.6       | 2552.3      | 2177.5      | 1744.6      | 797.9      | 591.7      | 502.2      |
|                    |     | MAD            | 10027.8       | 10213.1       | 5741.8       | 3264.7       | 1774.7       | 1528.0      | 1648.3      | 1211.4      | 253.4      | 173.5      | 129.0      |
| Policy $\lambda_v$ | I.1 | Time-stability | <b>109.1</b>  | <b>60.5</b>   | <b>22.3</b>  | <b>15.4</b>  | <b>6.2</b>   | <b>6.1</b>  | <b>3.4</b>  | <b>3.8</b>  | <b>3.1</b> | <b>2.6</b> | <b>2.5</b> |
|                    |     | MAD            | 74.1          | 36.5          | 8.5          | 9.7          | 2.6          | 2.7         | 1.0         | 1.5         | 0.6        | 0.6        | 0.5        |
|                    | I.2 | Total regret   | <b>2244.2</b> | <b>1163.8</b> | <b>46.1</b>  | <b>23.3</b>  | <b>15.4</b>  | <b>13.3</b> | <b>9.0</b>  | <b>10.0</b> | <b>5.7</b> | <b>5.2</b> | <b>5.2</b> |
|                    |     | MAD            | 3268.4        | 1874.0        | 64.4         | 32.9         | 22.0         | 19.0        | 12.8        | 13.9        | 7.7        | 7.1        | 7.1        |
|                    | I.3 | Time-stability | 200.0         | 144.5         | 58.4         | 22.4         | 15.1         | 9.7         | 8.3         | 6.0         | 5.6        | 4.7        | 4.3        |
|                    |     | MAD            | 0.0           | 38.7          | 28.6         | 7.7          | 6.2          | 3.8         | 3.1         | 1.6         | 1.4        | 1.1        | 0.7        |
|                    | I.1 | Total regret   | 10785.2       | 6594.4        | 3361.4       | 742.1        | 517.2        | 341.1       | 228.6       | 180.5       | 156.7      | 142.6      | 132.9      |
|                    |     | MAD            | 6942.5        | 4936.1        | 3504.3       | 549.0        | 409.9        | 263.9       | 138.1       | 106.9       | 95.1       | 89.4       | 84.3       |
|                    | I.2 | Time-stability | 200.0         | 198.0         | 108.6        | 68.7         | 29.1         | 20.3        | 15.0        | 11.7        | 10.4       | 8.4        | 7.3        |
|                    |     | MAD            | 0.0           | 3.5           | 31.4         | 33.2         | 8.0          | 3.6         | 2.4         | 1.9         | 1.3        | 0.9        | 0.5        |
|                    | I.3 | Total regret   | 27200.2       | 20596.5       | 9600.6       | 5408.1       | 2264.0       | 1610.5      | 1214.1      | 844.4       | 753.8      | 578.3      | 513.7      |
|                    |     | MAD            | 11068.9       | 6487.9        | 4343.4       | 2991.2       | 1072.0       | 372.5       | 414.4       | 300.8       | 235.1      | 133.8      | 129.9      |

Note. The numbers in superscript of time-stability denote the number of instances out of 20 for which the corresponding policy failed to converge within  $T$  time periods
